# Supplementary material for: Inorganic Colloidal Electrolyte for Highly Robust Zinc-Ion Batteries
Source: PubMed Central journal article supplement (PMC8187543; doi:10.1007/s40820-021-00595-6), 2021-02-11
Supplement: 40820_2021_595_MOESM1_ESM.pdf [file 40820_2021_595_MOESM1_ESM.pdf]

Supporting Information for

# Inorganic Colloidal Electrolyte for Highly Robust Zinc-Ion Batteries

Jiawei Gao<sup>1, #</sup>, Xuesong Xie<sup>1, #</sup>, Shuquan Liang<sup>1, 3</sup>, Bingan Lu<sup>2, \*</sup>, Jiang Zhou<sup>1, 3, \*</sup>

<sup>1</sup>School of Materials Science and Engineering, Central South University, Changsha 410083, P. R. China

<sup>2</sup>School of Physics and Electronics, Hunan University, Changsha 410082, P. R. China

<sup>3</sup>Key Laboratory of Electronic Packaging and Advanced Functional Materials of Hunan Province, Central South University, Changsha 410083, P. R. China.

<sup>#</sup>Jiawei Gao and Xuesong Xie contributed equally to this work.

\*Corresponding authors. E-mail: [zhou\\_jiang@csu.edu.cn](mailto:zhou_jiang@csu.edu.cn) (Jiang Zhou); [luba2012@hnu.edu.cn](mailto:luba2012@hnu.edu.cn) (Bingan Lu)

## Supplementary Figures and Tables

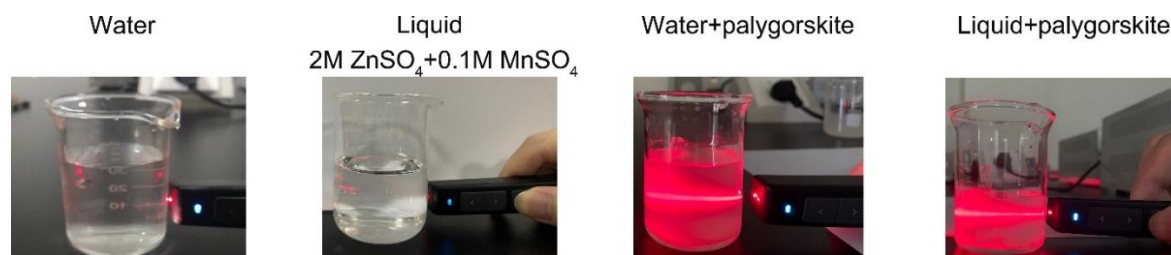

**Fig. S1** Tyndall effect in water, liquid, water + palygorskite and liquid + palygorskite

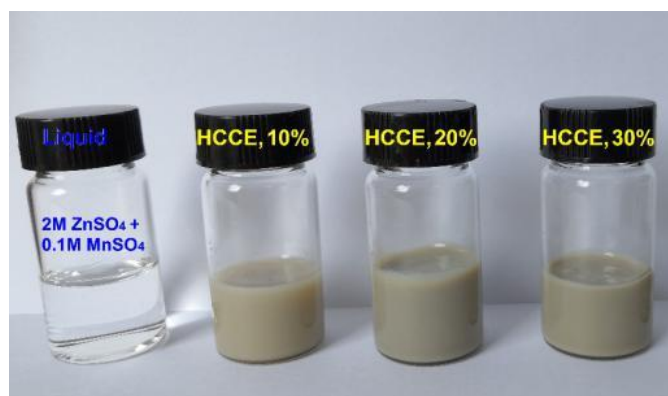

**Fig. S2** Photographic images of liquid electrolyte and concentration colloidal electrolyte (HCCE, 10 %, 20 % and 30 %)

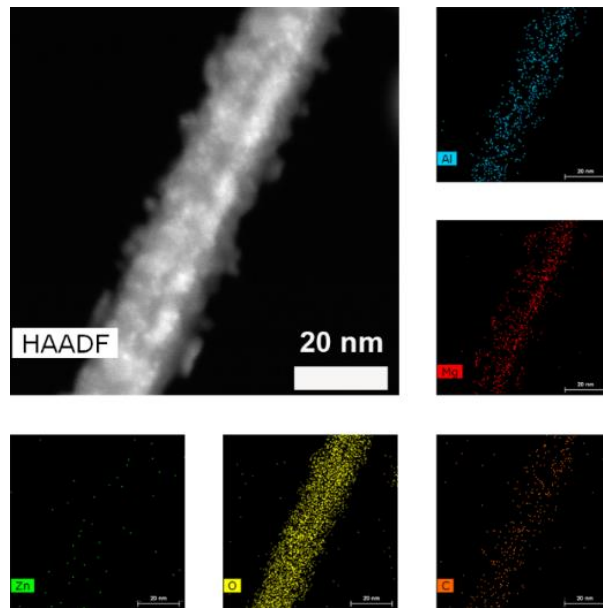

**Fig. S3** TEM micrograph with EDX elemental (Mg, Al, Zn, O, C) mapping images of raw material powders (Palygorskite)

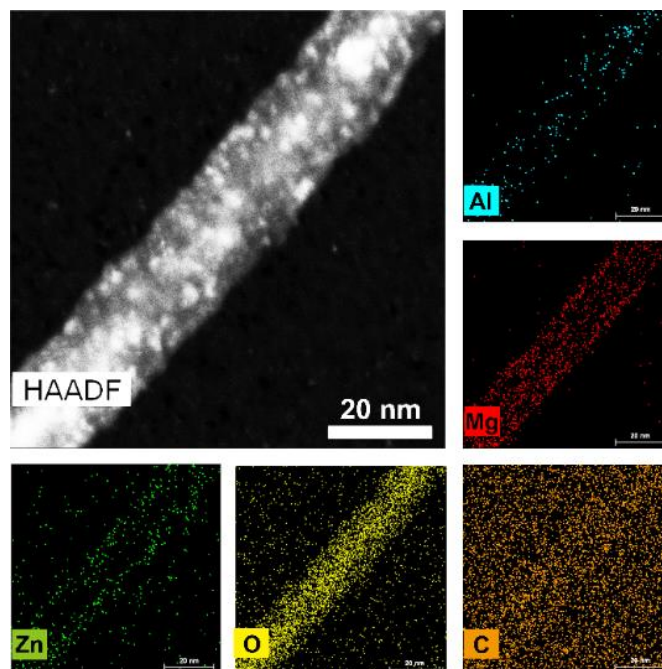

**Fig. S4** TEM and EDX elemental (Mg, Al, Si, O, Zn) mapping images of colloidal electrolyte (after drying)

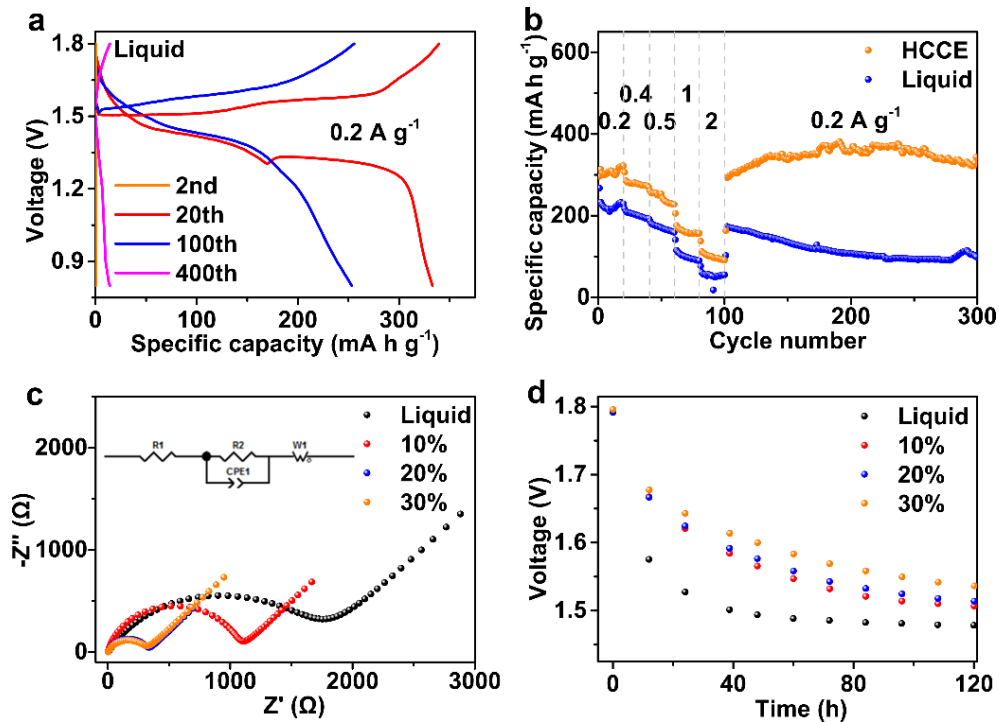

**Fig. S5** (a) Galvanostatic charge-discharge curves of the different cycles at 0.2 A g<sup>-1</sup> of the cell with liquid electrolyte. (b) Rate capability of the cell with HCCE and liquid electrolyte from 200 to 2000 mA g<sup>-1</sup>. (c) Nyquist plots, equivalent circuit and fitted results of different colloidal concentrations electrolyte and liquid electrolyte based on Zn-MnO<sub>2</sub> cells (an ohmic internal resistance and a charge-transfer resistance shown in **Table S1**). (d) Open circuit potential decays for the different concentration colloidal electrolyte and liquid electrolyte after the conditions (charging and discharging at current density of 200 mA g<sup>-1</sup> during two cycle, then charging at current density of 100 mA g<sup>-1</sup> to 1.8V, and holding at this voltage for 24 h)

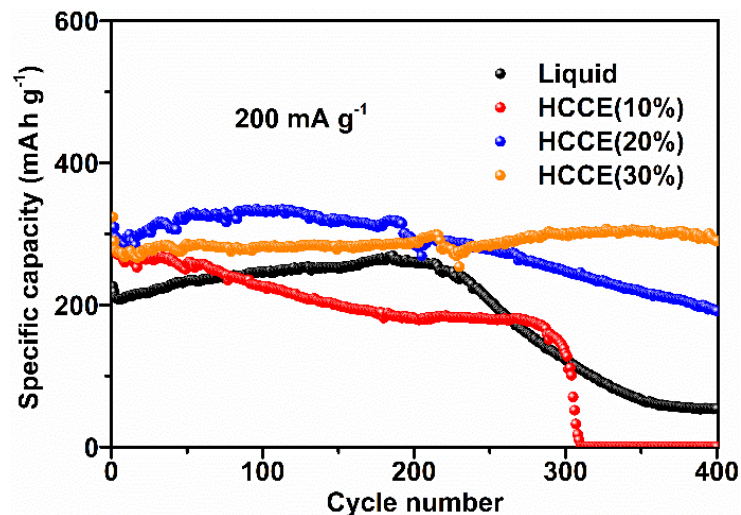

**Fig. S6** Different of electrochemical performance between the colloidal electrolyte with different concentration

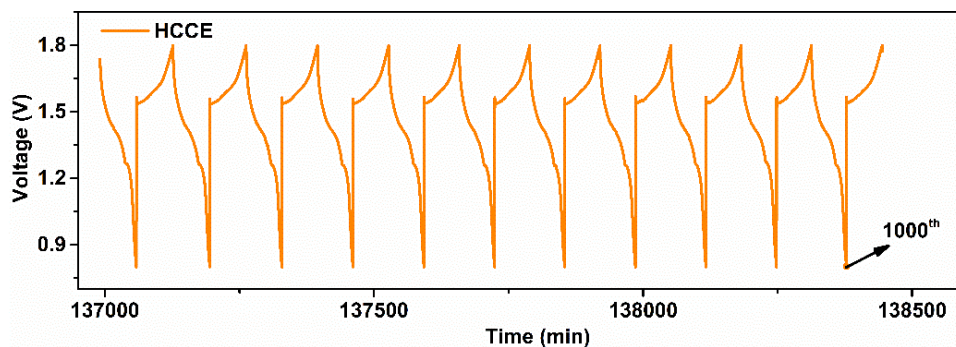

**Fig. S7** Last ten charge/discharge curves of the cell with HCCE at 0.5 A g<sup>-1</sup>

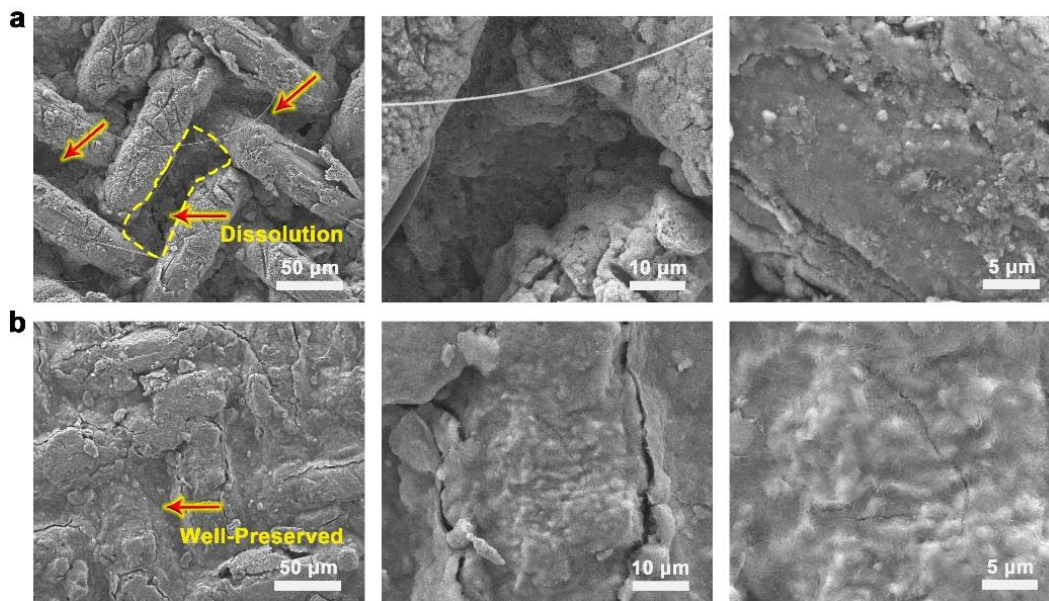

**Fig. S8** SEM images of the cathode of the battery after 200 cycles at 1 A g<sup>-1</sup> with (a) Liquid electrolyte and (b) the HCCE

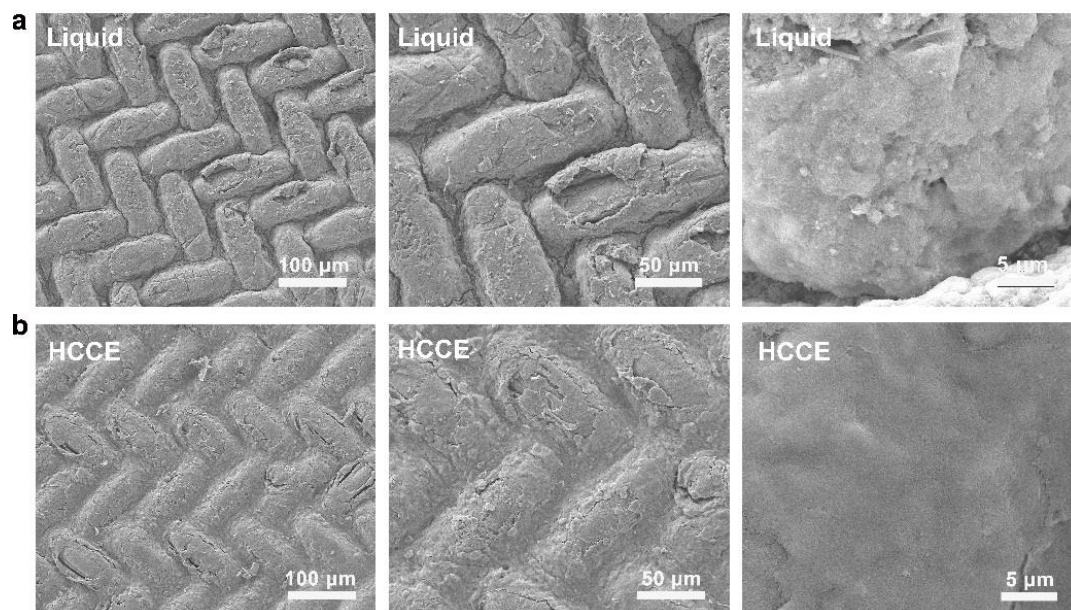

**Fig. S9** SEM images of the cathode of the battery after 400 cycles at 0.2 A g<sup>-1</sup> with (a) Liquid electrolyte and (b) the HCCE

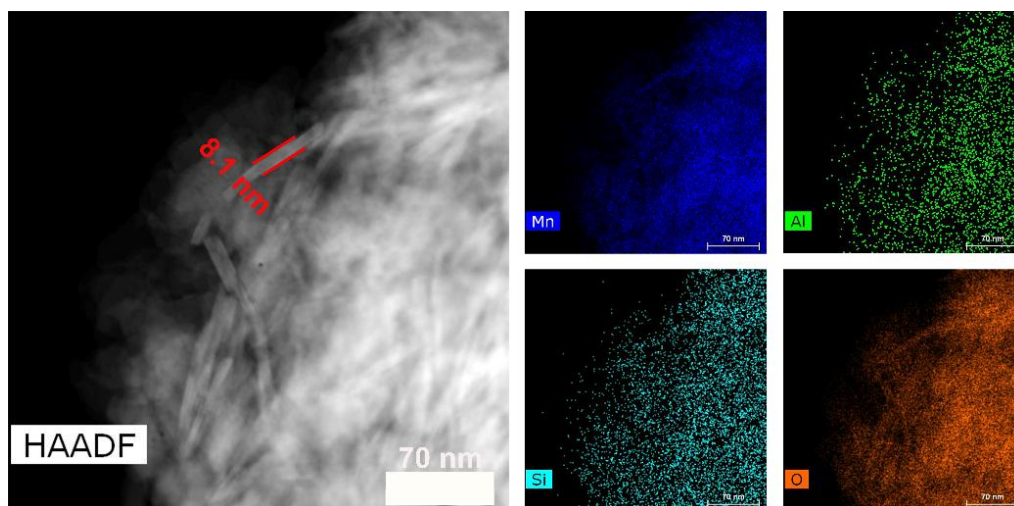

**Fig. S10** TEM and EDX elemental (Mg, Mn, O, Zn) mapping images of cathode with liquid after initial fully discharge to 0.8 V at 200 mA g<sup>-1</sup>

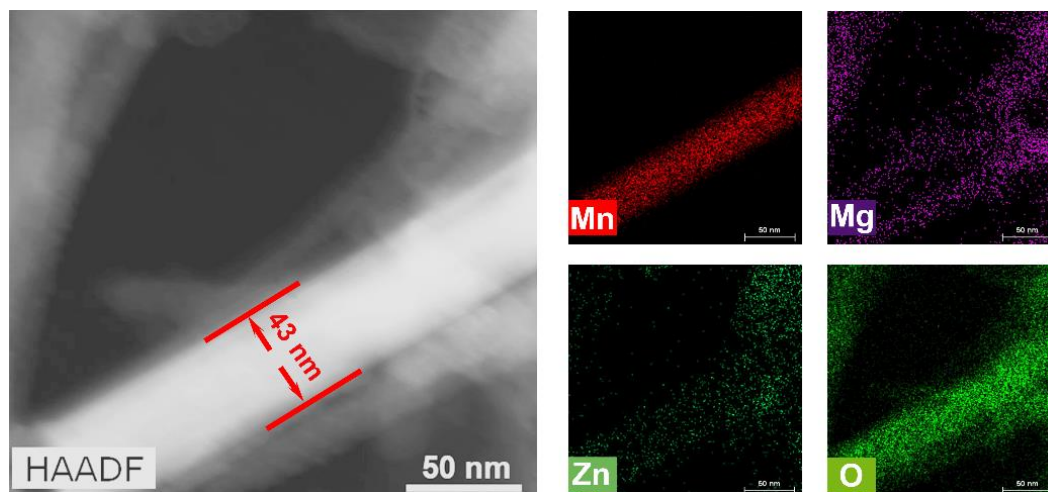

**Fig. S11** TEM and EDX elemental (Mg, Mn, O, Zn) mapping images of cathode with HCCE after initial fully discharge to 0.8 V at 200 mA g<sup>-1</sup>

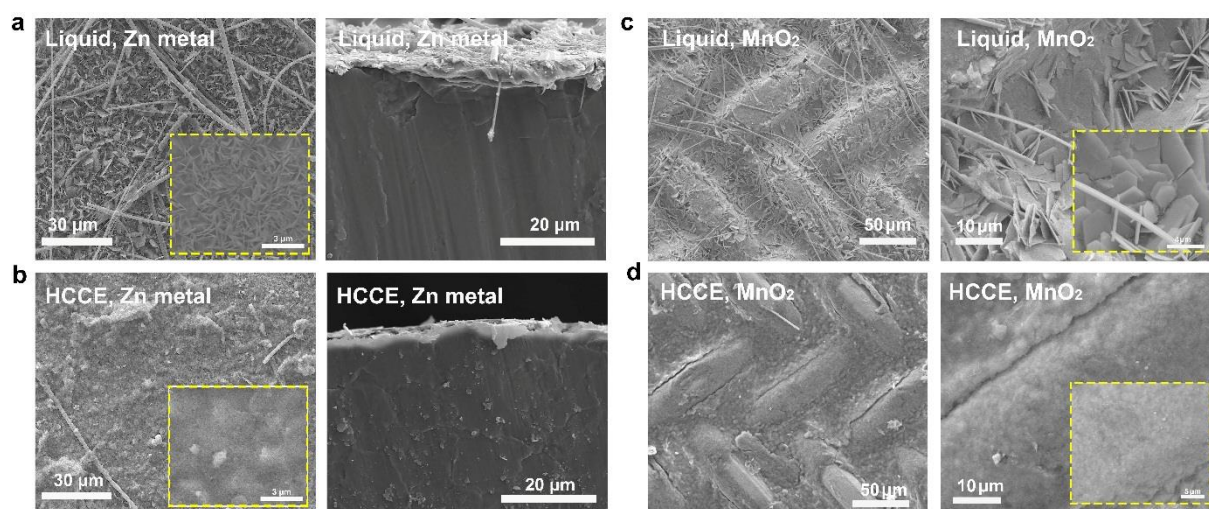

**Fig. S12** SEM images of 1<sup>st</sup> fully discharge to 0.8V: on the anode of the cell with (a) Liquid electrolyte and (b) the HCCE. on the cathode of the cell with (c) Liquid electrolyte and (d) the HCCE

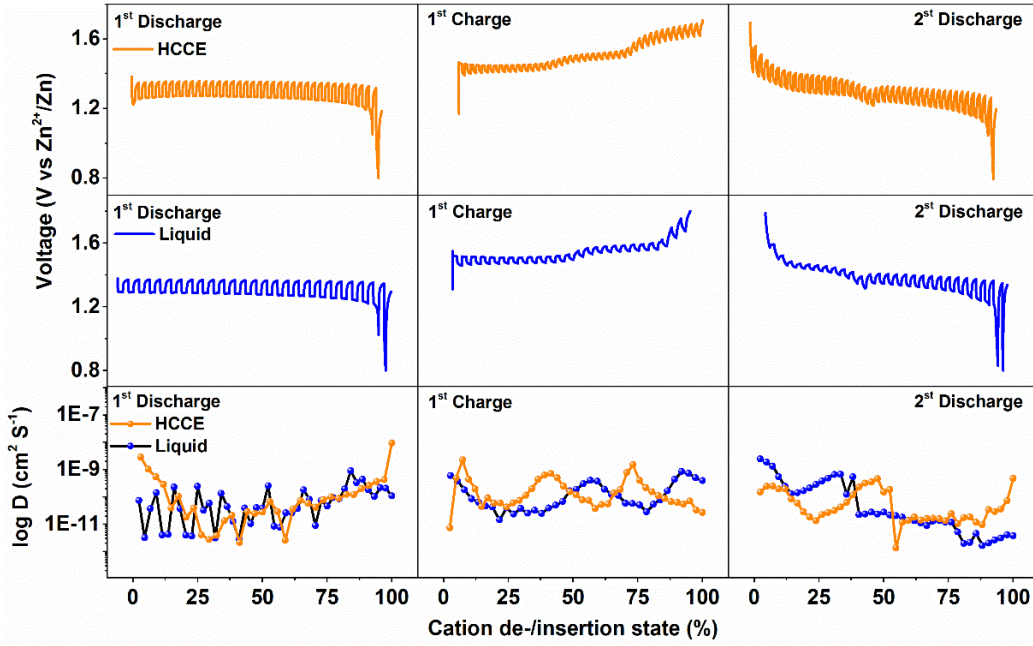

**Fig. S13** GITT and diffusion coefficient contrast curve of the Zn/ $\alpha$ -MnO<sub>2</sub> cells with HCCE and Liquid electrolyte (The detail calculation process is listed in the **Fig. S14**)

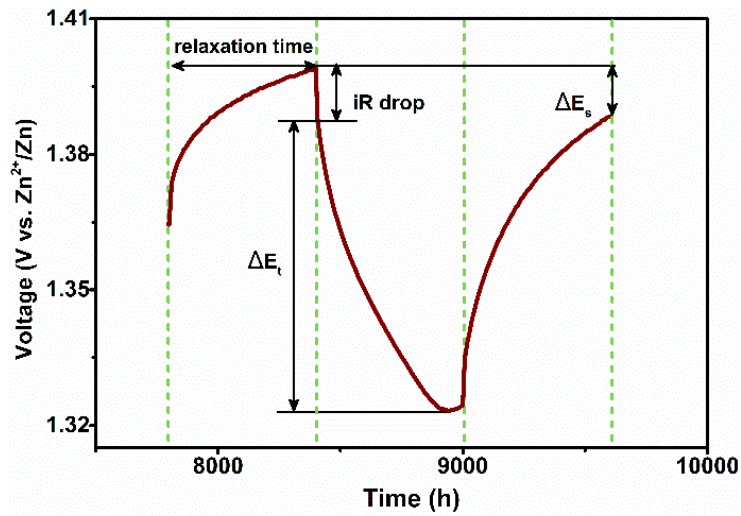

**Fig. S14**  $E$  vs.  $t$  curves of the MnO<sub>2</sub> electrode cycled with HCCE and liquid electrolyte for a single GITT during discharge process. The diffusion coefficient was conducted by using Galvanostatic Intermittent Titration Technique (GITT) and calculated based on Eq. as follows [S1]:

$$D = \frac{4L^2}{\pi t} \left( \frac{\Delta E_s}{\Delta E_t} \right)^2$$

Where  $t$  is the duration of the current pulse (s),  $\Delta E_s$  is the steady-state potential change (V) by the current pulse.  $\Delta E_t$  is the potential change (V) of the constant current pulse excluded the  $iR$  drop.  $L$  is ion diffusion length (cm); for compact electrode, it is equal to the thickness of the electrode.

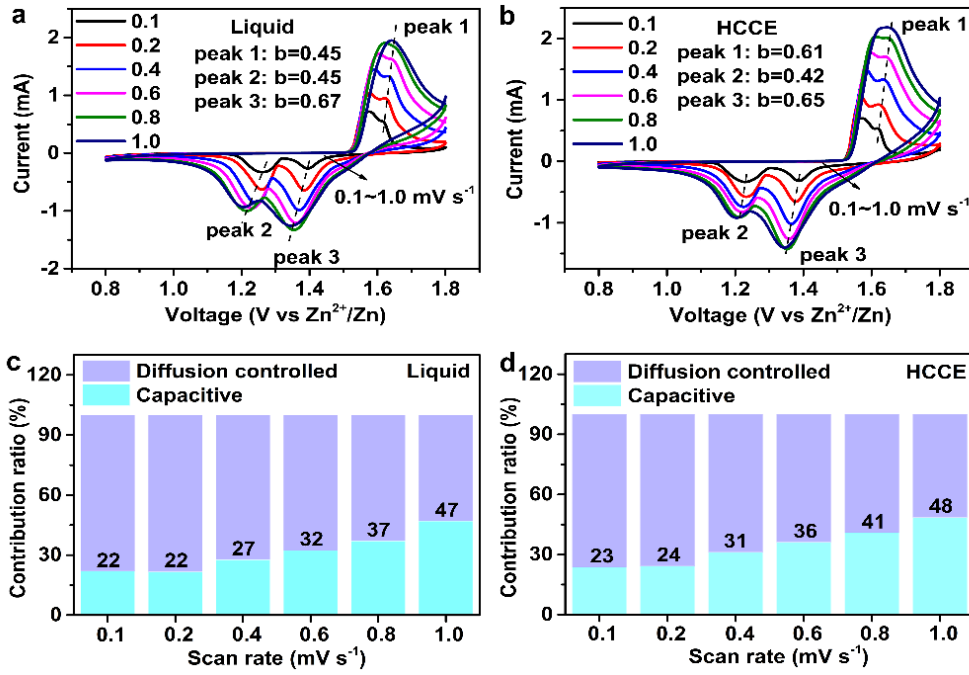

**Fig. S15** (a) CV curve of the cell with Liquid electrolyte at different scan rates; (b) CV curve of the cell with HCCE at different scan rates; (c) capacitance contribution ratio of the cell with Liquid electrolyte at different scan rates; (d) capacitance contribution ratio of the cell with HCCE at different scan rates

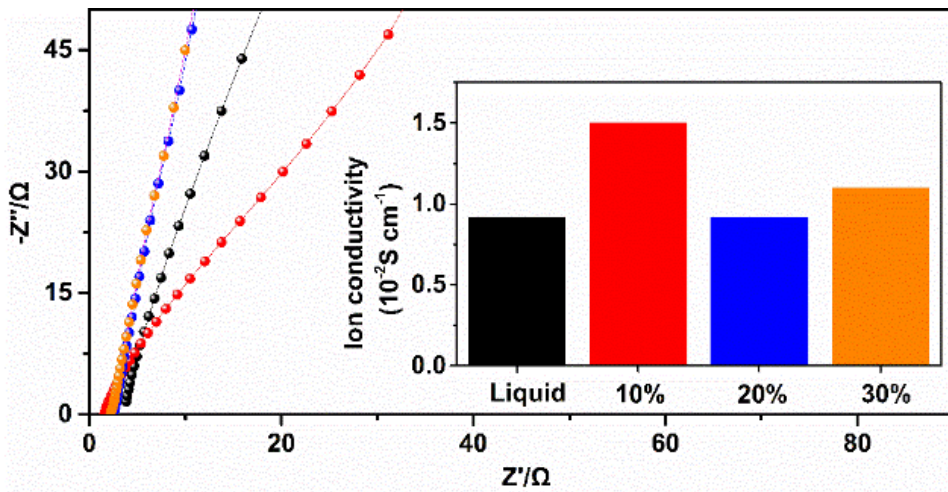

**Fig. S16** AC impedance spectra of the different concentration HCCE and liquid electrolyte in the frequency range from 10 kHz to 0.01 Hz, inset: ion conductivity of different concentration HCCE and liquid electrolyte. The corresponding ionic conductivity was calculated by [S2]:  $\sigma = \frac{l}{RA}$  where  $l$  is the thickness of gel electrolyte,  $R$  is the bulk resistance,  $A$  is the contact area of electrolyte.

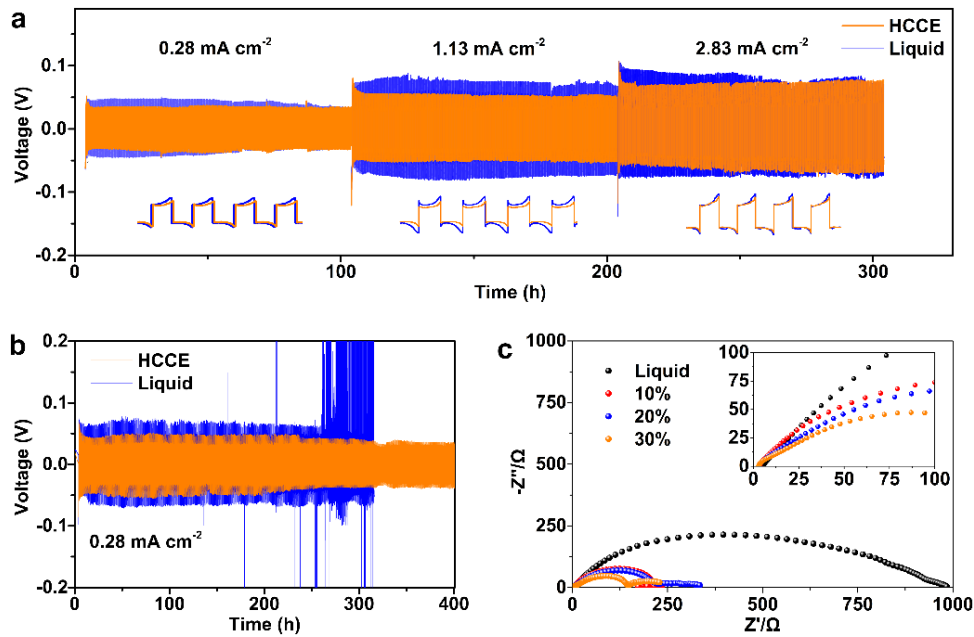

**Fig. S17** Based on Zn-Zn symmetrical cells: (a) Cyclic plating/stripping process with the HCCE and liquid electrolyte at different constant current density of 0.28, 1.13, and 2.83 mA cm<sup>-2</sup>. (b) Cyclic plating/stripping process with the HCCE and liquid electrolyte at current density of 0.28 mA cm<sup>-2</sup>. (c) Nyquist plots, equivalent circuit and fitted results of different concentration Colloidal electrolyte and Liquid electrolyte (an ohmic internal resistance and a charge-transfer resistance shown in Table S2)

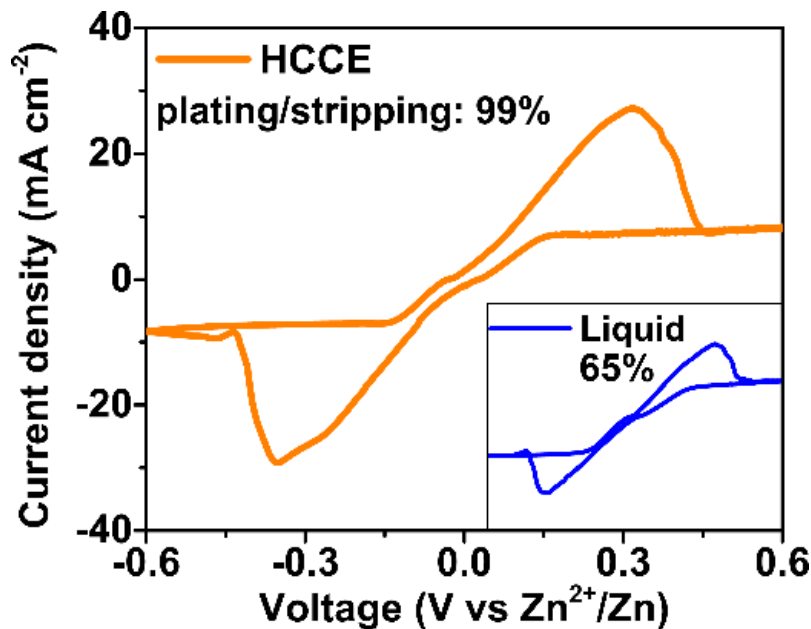

**Fig. S18** Cyclic voltammogram of Zn plating/stripping in Zn-Zn symmetric cells with HCCE at a scan rate of 2 mV s<sup>-1</sup> (in the third cycle). Inset: Cyclic voltammetry in liquid electrolyte under the same conditions



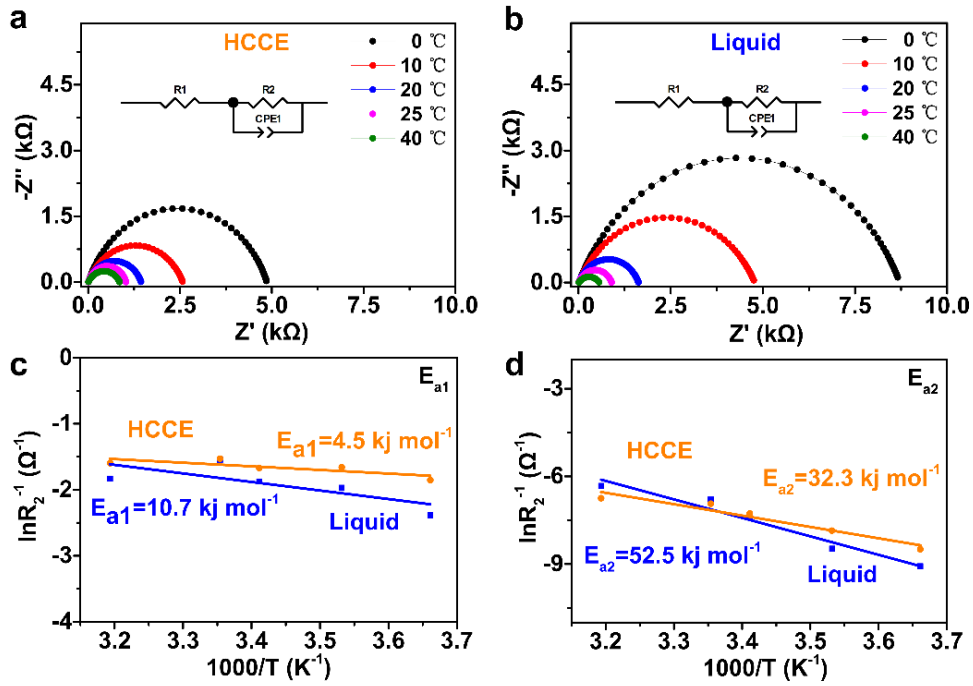

**Fig. S19** (a) and (b) Nyquist plots of the Zn/Zn symmetric cells at different temperatures (an ohmic internal resistance and a charge-transfer resistance shown in **Table S5**). (c) and (d) Arrhenius behavior and comparison of activation energies between the  $R_s$  and  $R_{ct}$  derived in Nyquist plots of Zn/Zn symmetrical cells

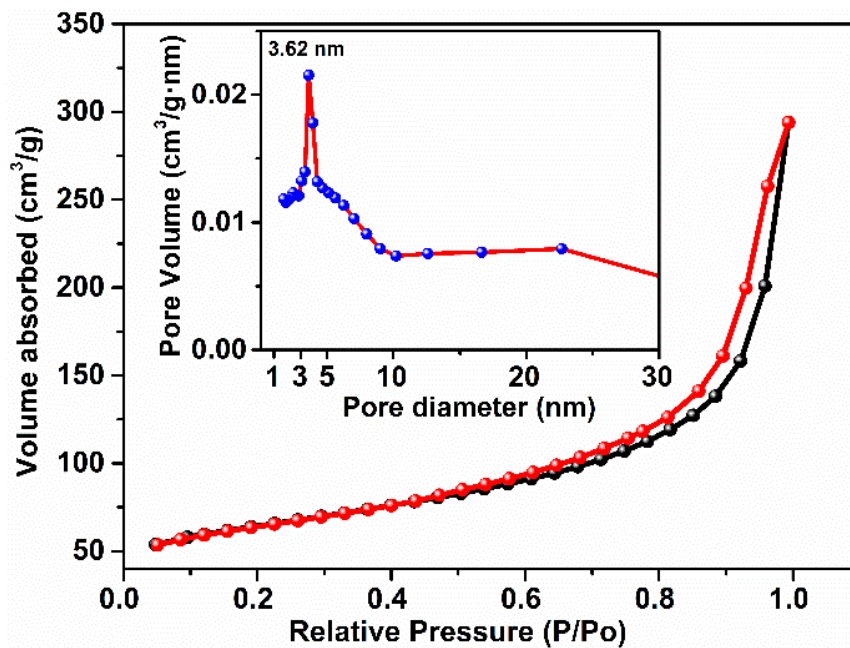

**Fig. S20** Absorption and desorption curves (inset: the aperture distribution) of the raw material (Palygorskite)

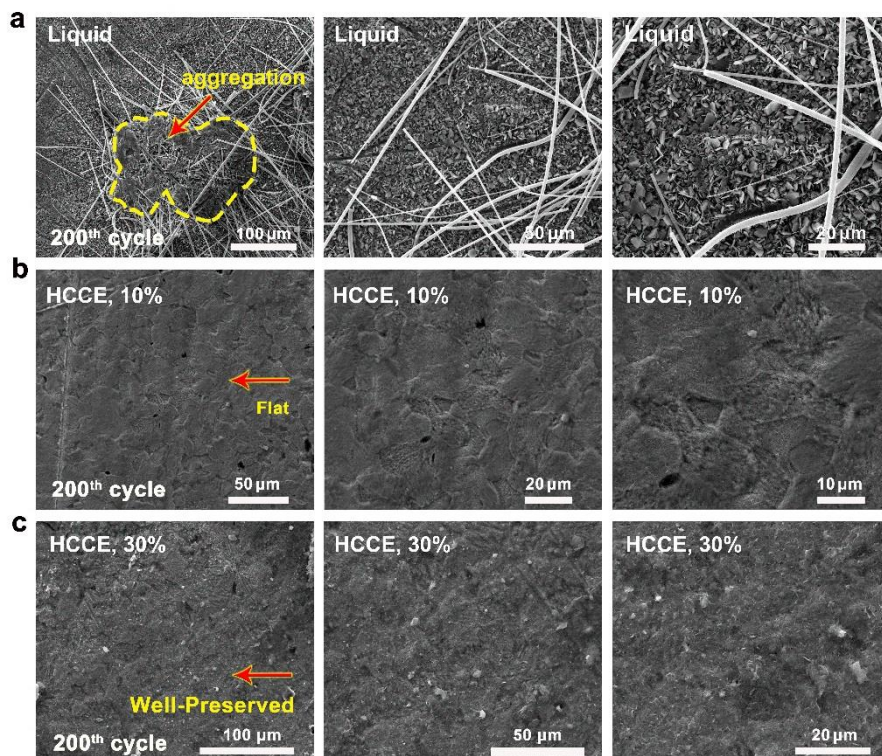

**Fig. S21** SEM images of anode of the battery after 200 cycles at 1000 mA g<sup>-1</sup> with (a) liquid electrolyte, (b) HCCE (10%), (c) HCCE (30%)

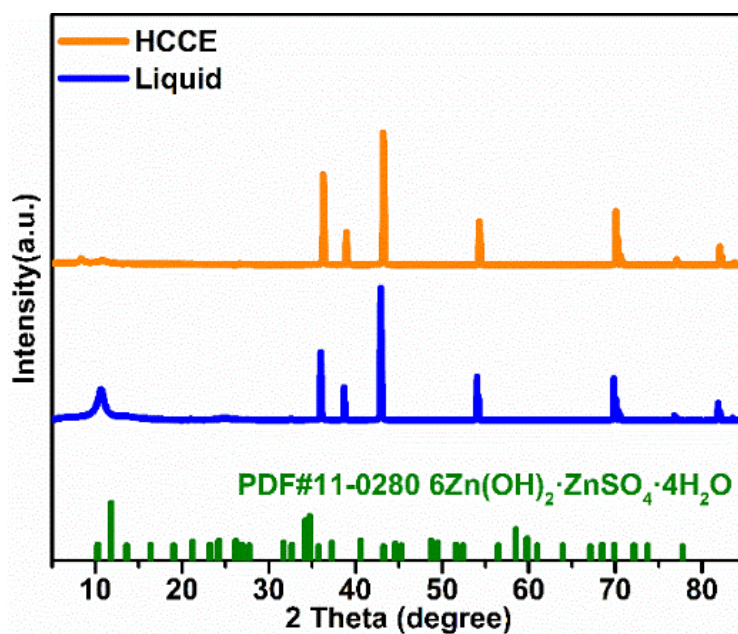

**Fig. S22** The ex-situ XRD patterns of cathode cycled over 200 cycles at 1000 mA g<sup>-1</sup> of the cell with the HCCE and liquid ones

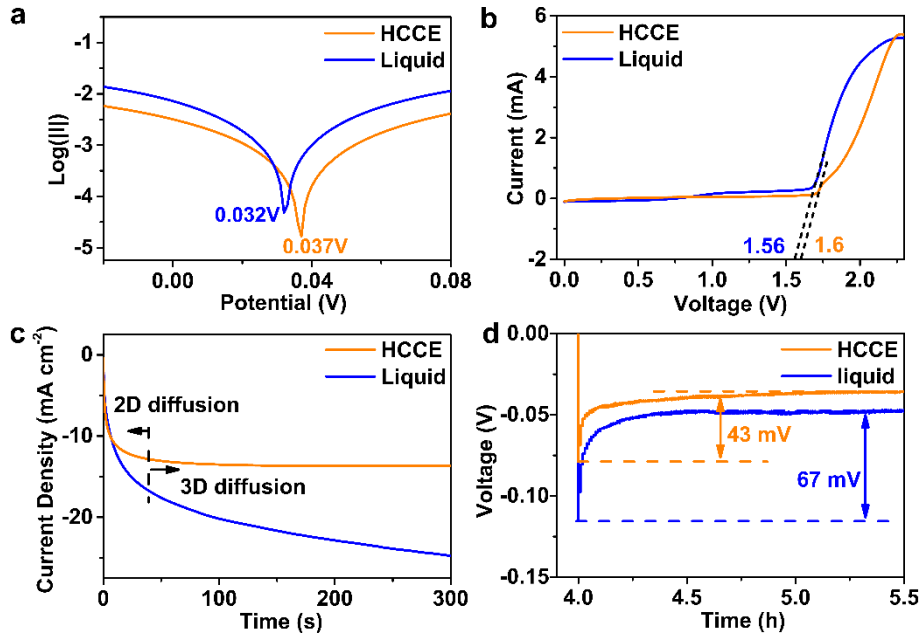

**Fig. S23** (a) Linear polarization curves (Scan rate:  $0.01 \text{ V s}^{-1}$ ) and (c) Chronoamperometry of zinc when in contact with different electrolytes based on Zn-Zn symmetrical cells at a overpotential of  $-200 \text{ mV}$  for  $300 \text{ s}$  that applied, (b) Linear Sweep Voltammetry (LSV) curves based on Zn-SSWM cells, (d) voltage-time curves during Zn nucleation at  $2 \text{ mA cm}^{-2}$  of the Zn/Cu cells with HCCE and liquid electrolyte

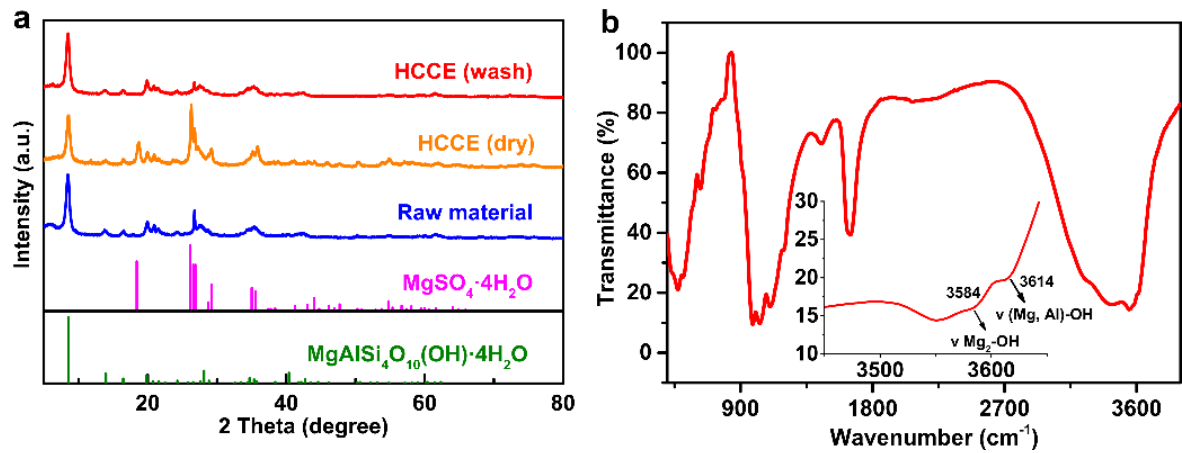

**Fig. S24** (a) ex-situ XRD and (b) FTIR spectra of the HCCE washed by deionized water

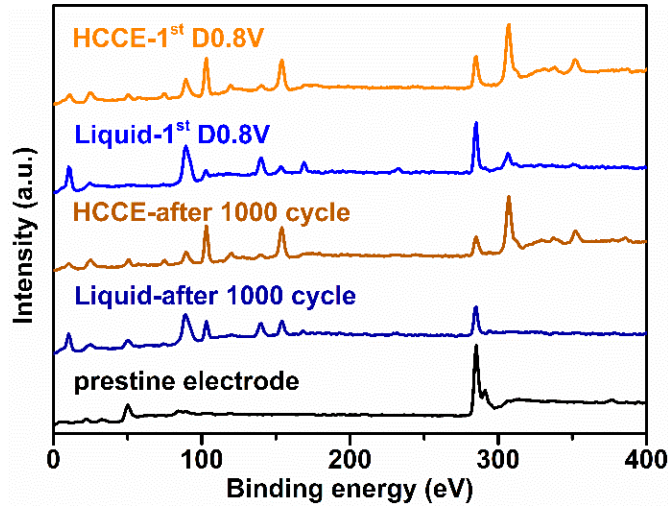

**Fig. S25** Full XPS spectrum image of the cathode of the battery with HCCE and liquid electrolyte after initial discharge and 1000 cycles

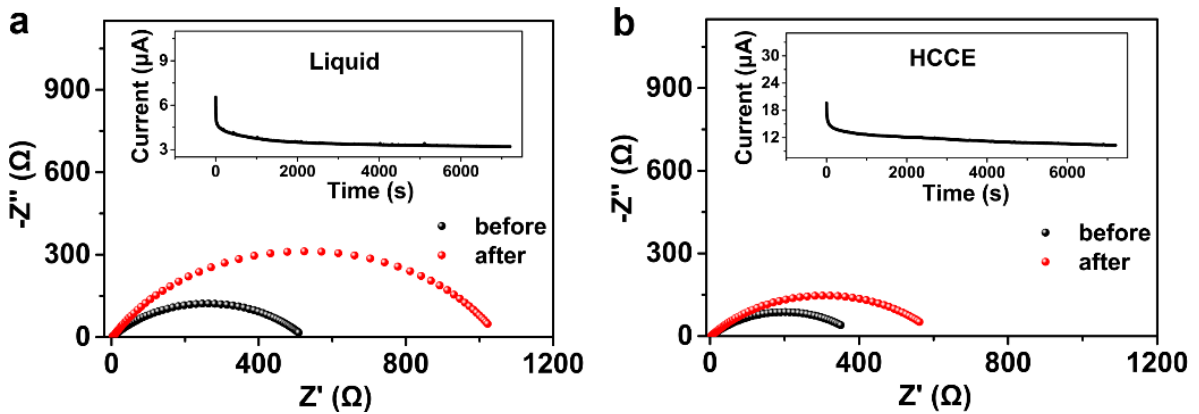

**Fig. S26** EIS of the Zn-Zn symmetric cell (a) with liquid electrolyte and (b) HCCE before and after polarization (an ohmic internal resistance and a charge-transfer resistance shown in **Table S3**), inset: variation of current with time during polarization at an applied voltage of 5 mV at room temperature. The values of  $t_+$  were calculated using the following equation [S3]: 
$$t_+ = \frac{I_s(\Delta V - I_0 R_0)}{I_0(\Delta V - I_s R_s)}$$

Where  $I_0$  and  $I_s$  refer the initial and steady-state current,  $\Delta V$  is the potential applied across the cell,  $R_0$  and  $R_s$  are, respectively, the initial and steady-state resistances of the passivation layer on the Zn electrode determined by impedance spectroscopy (the specific data shown in **Table S4**).

**Table S1** Impedance fitting parameters of different concentration of Colloidal electrolyte Zn/MnO<sub>2</sub> cells before cycling

|          | Liquid             |           | 10%                |           | 20%                |           | 30%                |           |
|----------|--------------------|-----------|--------------------|-----------|--------------------|-----------|--------------------|-----------|
|          | Value              | Error (%) | Value              | Error (%) | Value              | Error (%) | Value              | Error (%) |
| $R_s$    | 3.2                | 7.91      | 1.3                | 4.69      | 3.1                | 0.06      | 2.1                | 3.15      |
| $R_{ct}$ | 1697               | 2.77      | 1058               | 1.62      | 313                | 4.04      | 299                | 1.61      |
| $W_1$    | 1.9E <sup>-5</sup> | 7.93      | 1.3E <sup>-6</sup> | 6.58      | 8.4E <sup>-7</sup> | 3.02      | 1.4E <sup>-6</sup> | 2.61      |

**Table S2** Impedance fitting parameters of different concentration of Colloidal electrolyte Zn/Zn symmetric cells before cycling

|          | liquid | 10%   | 20%   | 30%   |
|----------|--------|-------|-------|-------|
| $R_s$    | 6.057  | 3.286 | 2.892 | 2.855 |
| $R_{ct}$ | 984.3  | 217.9 | 224.5 | 145.3 |

**Table S3** Impedance fitting parameters of different concentration of Colloidal electrolyte Zn/Zn symmetric cells before cycling

|          | Liquid |           | HCCE  |           |
|----------|--------|-----------|-------|-----------|
|          | Value  | Error (%) | Value | Error (%) |
| Before   |        |           |       |           |
| $R_s$    | 1.07   | 8.40      | 2.725 | 2.89      |
| $R_{ct}$ | 522.5  | 1.86      | 393.3 | 1.82      |
| After    |        |           |       |           |
| $R_s$    | 2.722  | 3.66      | 2.683 | 2.88      |
| $R_{ct}$ | 1049   | 1.72      | 608.8 | 1.57      |

**Table S4** Calculation of transference numbers from analysis of polarization experiments

| Cell   | $\Delta V$ (mV) | $R_o$ ( $\Omega$ ) | $R_s$ ( $\Omega$ ) | $I_o$ ( $\mu A$ ) | $I_s$ ( $\mu A$ ) | $t_+$ |
|--------|-----------------|--------------------|--------------------|-------------------|-------------------|-------|
| Liquid | 5               | 521.5              | 1046.3             | 6.542             | 3.206             | 0.498 |
| HCCE   | 5               | 390.6              | 606.1              | 19.61             | 10.32             | 0.644 |

**Table S5** The fitting resistance results of symmetric cells for the liquid and the HCCE by the equivalent circuit at difference temperature

| Symmetric Cells | Resistance( $\Omega$ ) | 0 °C ( $\Omega$ ) | 10 °C ( $\Omega$ ) | 20 °C ( $\Omega$ ) | 25 °C ( $\Omega$ ) | 40 °C ( $\Omega$ ) |
|-----------------|------------------------|-------------------|--------------------|--------------------|--------------------|--------------------|
| Liquid          | $R_{ct}$               | 8444              | 5039               | 1711               | 672.5              | 584.8              |
|                 | $R_s$                  | 20.57             | 11.92              | 9.766              | 6.116              | 6.098              |
| HCCE            | $R_{ct}$               | 4857              | 2569               | 1435               | 1026               | 850.8              |
|                 | $R_s$                  | 6.374             | 5.255              | 5.305              | 4.617              | 4.94               |

## Supplementary References

- [S1] G. Fang, C. Zhu, M. Chen, J. Zhou, B. Tang et al., Suppressing manganese dissolution in potassium manganate with rich oxygen defects engaged high-energy-density and durable aqueous zinc-ion battery. *Adv. Funct. Mater.* **29**(15), 1808375 (2019). <https://doi.org/10.1002/adfm.201808375>
- [S2] H. Li, Z. Liu, G. Liang, Y. Huang, Y. Huang et al., Waterproof and tailorable elastic rechargeable yarn zinc ion batteries by a cross-linked polyacrylamide electrolyte. *ACS Nano* **12**(4), 3140-3148 (2018). <https://doi.org/10.1021/acsnano.7b09003>
- [S3] J. Evans, C. A. Vincent, P. G. Bruce, Electrochemical measurement of transference numbers in polymer electrolytes. *Polymer* **28**(13), 2324-2328 (1987). [https://doi.org/10.1016/0032-3861\(87\)90394-6](https://doi.org/10.1016/0032-3861(87)90394-6)
